# Supplementary material
Source: publisher figshare collection journal article supplement (https://geolsoc.figshare.com/articles/dataset/_/3453689)
Supplement: Supplementary file 1 [file 1]

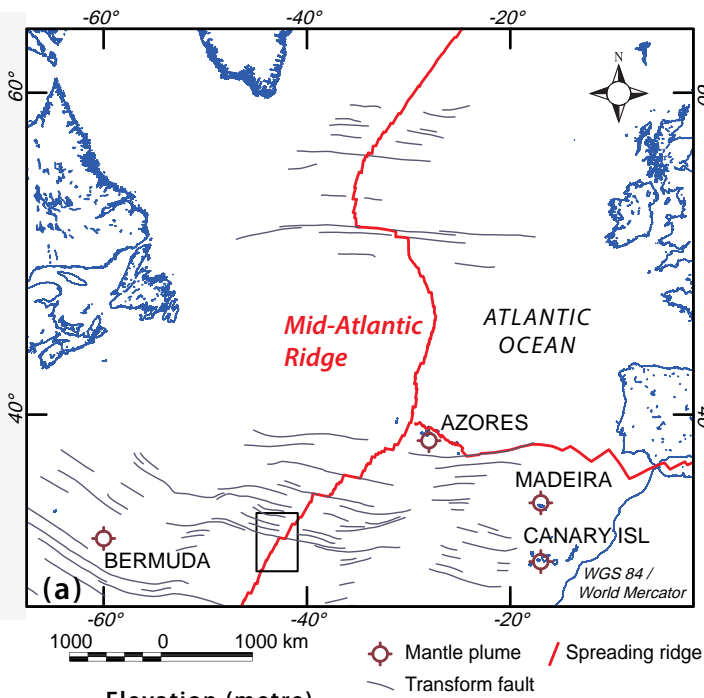

Elevation (metre)

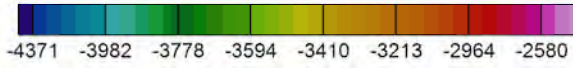

Bouguer gravity (mGal)

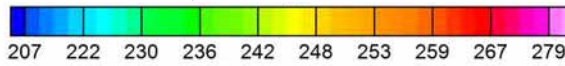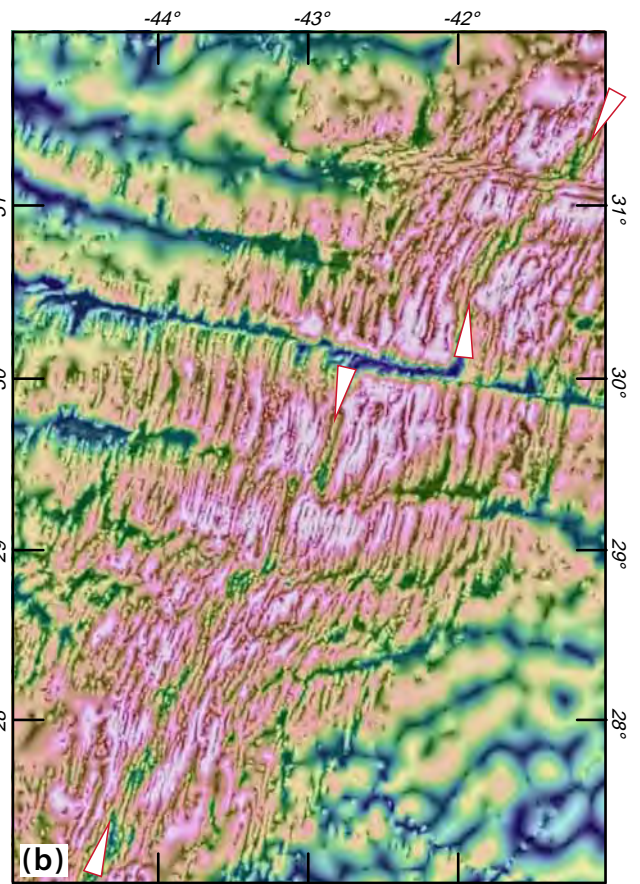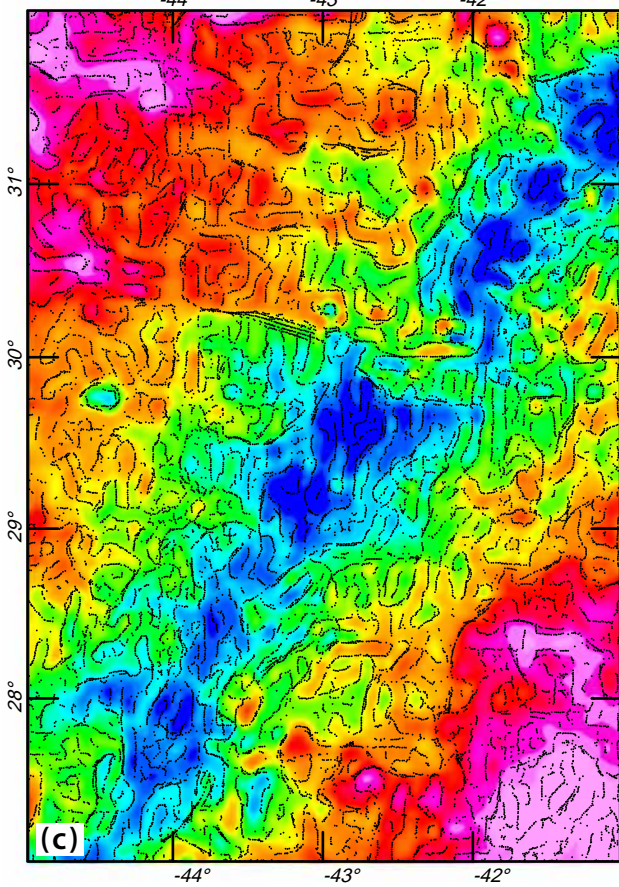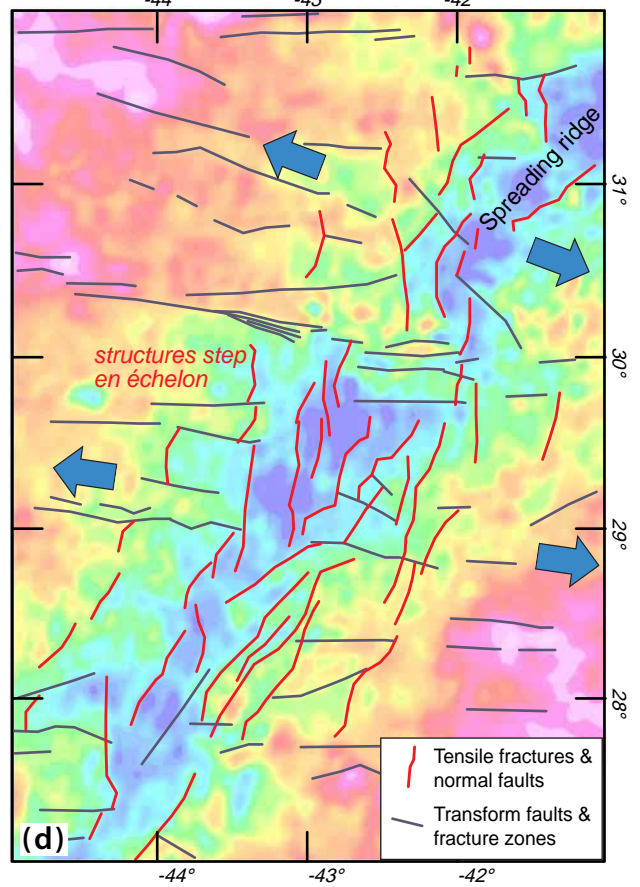

**Supplementary Fig. 1. Topography and gravity of a segment of the Mid-Atlantic Ridge.**

(a) Location and tectonic setting. (b) Enhanced SRTM30 topography data (Becker et al. 2009; colour scale is approximate due to enhancement of structural features) highlighting ridge-parallel faults and fractures and transform faults and fracture zones. Triangles mark the ridge axis. (c) EGM08 (Pavlis et al. 2012) Bouguer gravity anomaly with superposed edges in the total horizontal gradient. The active spreading centre corresponds to a Bouguer gravity low. (d) Simplified interpretation of (c) superposed on a lightened Bouguer gravity image. Gravity worms define a series of structures parallel to (northern segment) or stepping *en échelon* along the spreading ridge. Gravity highs and linear gravity worms along rifts interpreted on Venus in our study show equivalent patterns and are similarly truncated against faults with apparent horizontal offsets. Such similarities raise the question as to whether some rifts on Venus may be also formed by crustal spreading about central ridges?

BECKER, J. J., SANDWELL, D. T., SMITH, W. H. F., BRAUD, J., BINDER, B., DEPNER, J., FABRE, D., FACTOR, J., INGALLS, S., KIM, S-H., LADNER, R., MARKS, K., NELSON, S., PHARAOH, A., TRIMMER, R., VON ROSENBERG, J., WALLACE, G. & WEATHERALL P. 2009. Global Bathymetry and Elevation Data at 30 Arc Seconds Resolution: SRTM30\_PLUS. *Marine Geodesy*, **32**, 355-371.

PAVLIS, N. K., HOLMES, S. A., KENYON, S. C. & FACTOR, J. K. 2012. The development and evaluation of the Earth Gravitational Model 2008 (EGM2008). *Journal of Geophysical Research: Solid Earth*, **117**, doi:10.1029/2011JB008916.
