# Supplementary material
Source: publisher figshare collection journal article supplement (https://geolsoc.figshare.com/articles/dataset/_/3453689)
Supplement: Supplementary file 2 [file 1]

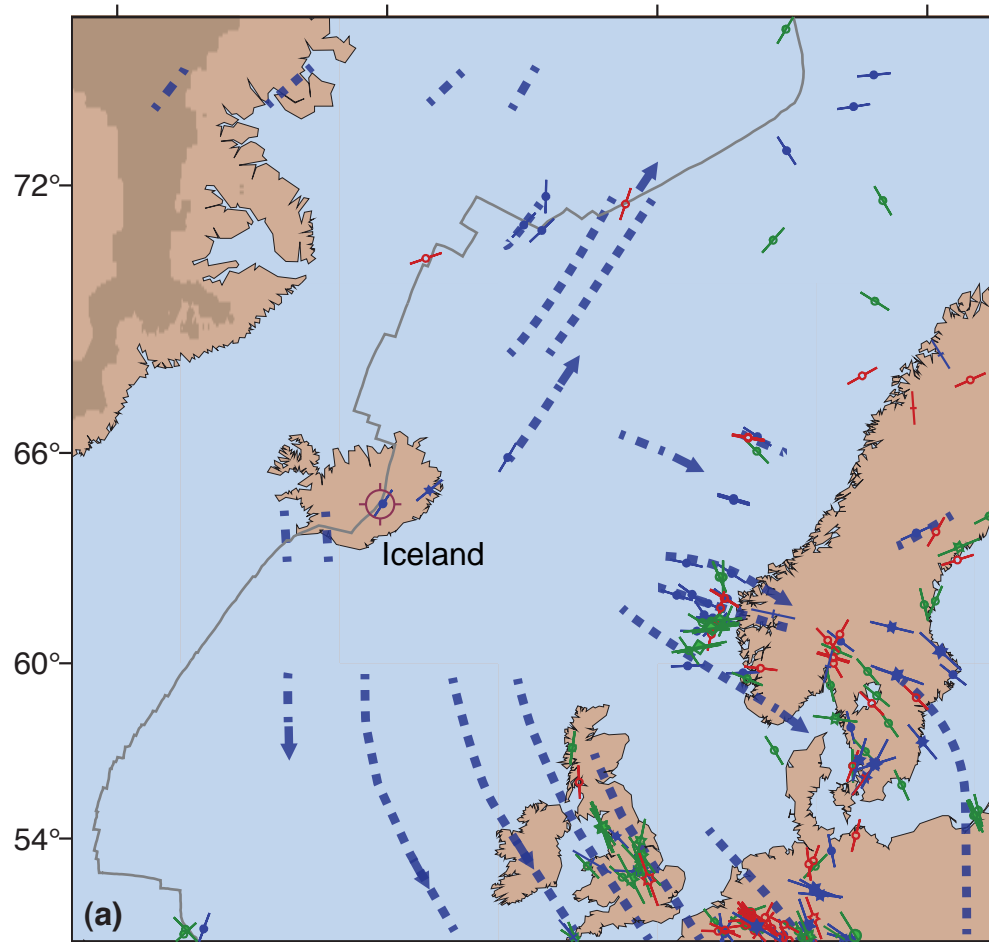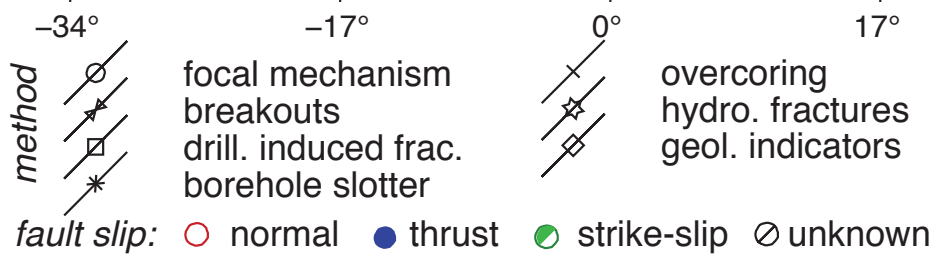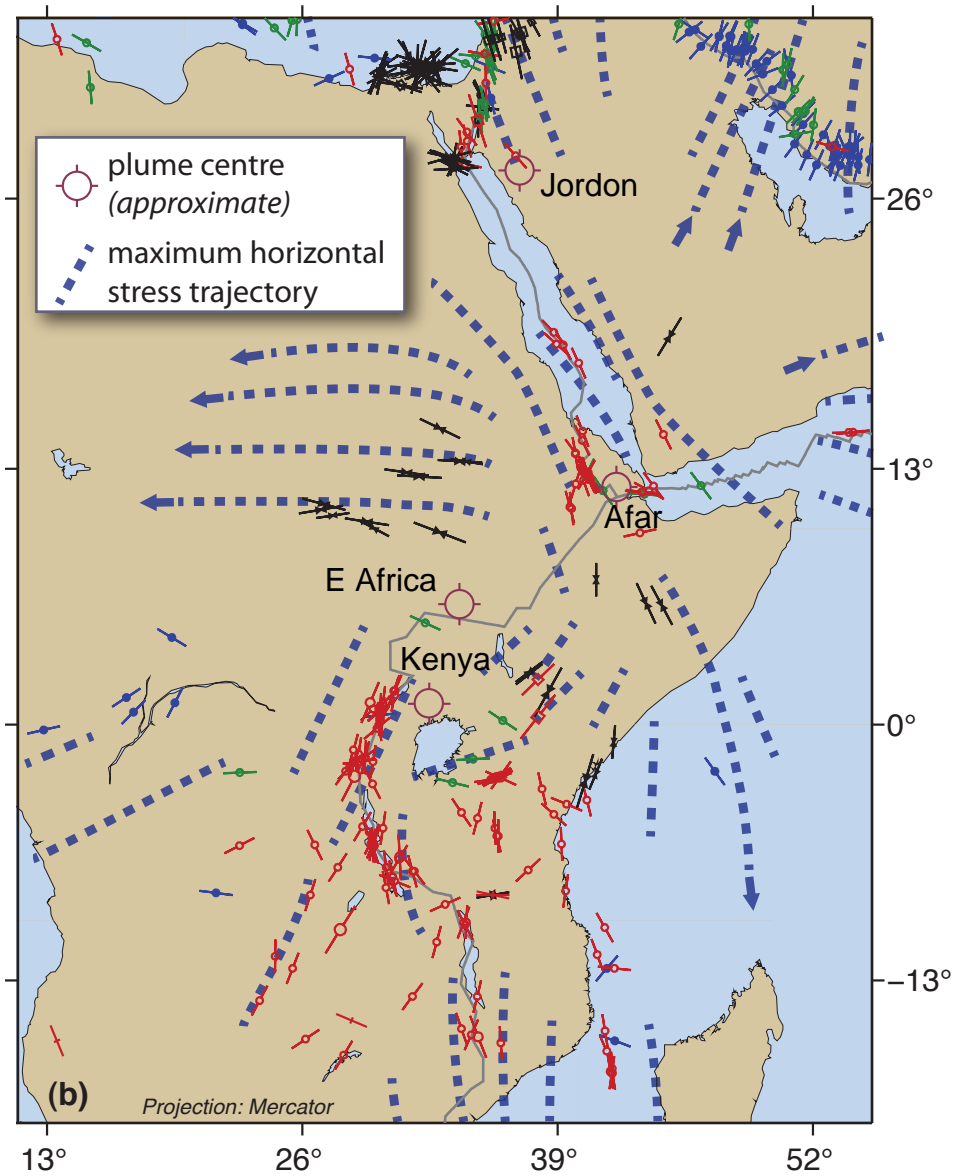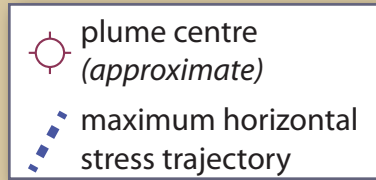

**Supplementary Fig. 2.** Maximum horizontal principal stress trajectories ( $\sigma_{\text{hmax}}$ ) associated with present-day mantle plumes. (a) NW Europe and Scandinavia. (b) East Africa and Arabia. Dashed thick lines = simplified  $\sigma_{\text{hmax}}$  trajectories from Heidbach et al. (2010). Stress data from the World Stress Map (Heidbach et al. 2008; modified after map prepared online, from <http://dc-app3-14.gfz-potsdam.de/pub/casmo/casmo.html>).

HEIDBACH, O., TINGAY, M., BARTH, A., REINECKER, J., KURFEB, D. & MÜLLER, B. 2008. The World Stress Map database release 2008, doi:10.1594/GFZ.WSM.Rel2008.

HEIDBACH, O., TINGAY, M., BARTH, A., REINECKER, J., KURFEB, D. & MÜLLER, B. 2010. Global crustal stress pattern based on the World Stress Map database release 2008. *Tectonophysics*, **482**, 3–15
