# Supplementary material
Source: publisher figshare collection journal article supplement (https://geolsoc.figshare.com/articles/dataset/_/3453689)
Supplement: Supplementary file 4 [file 1]

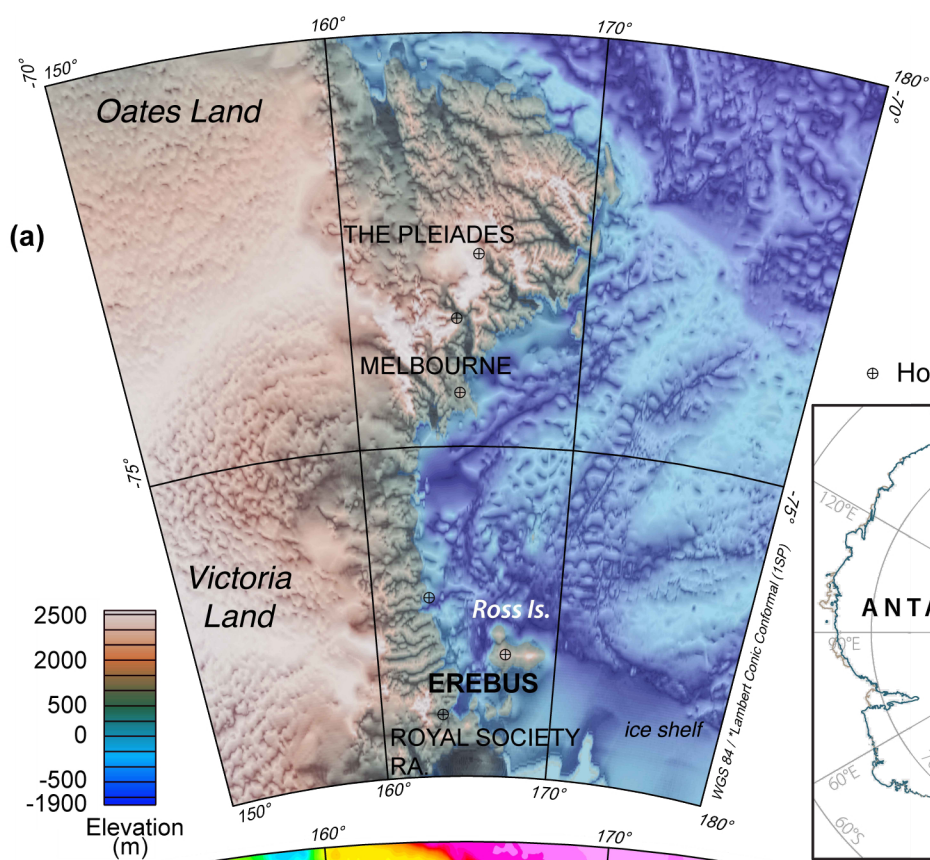

⊕ Holocene volcano

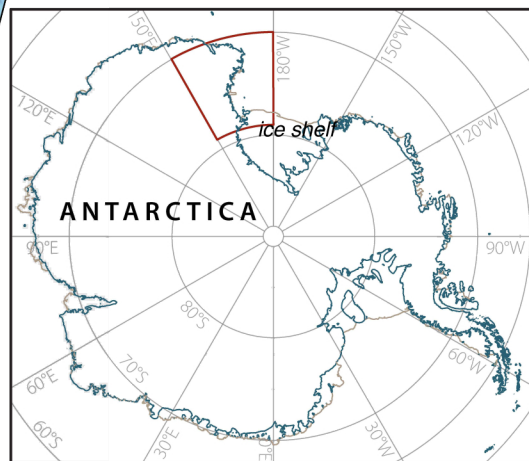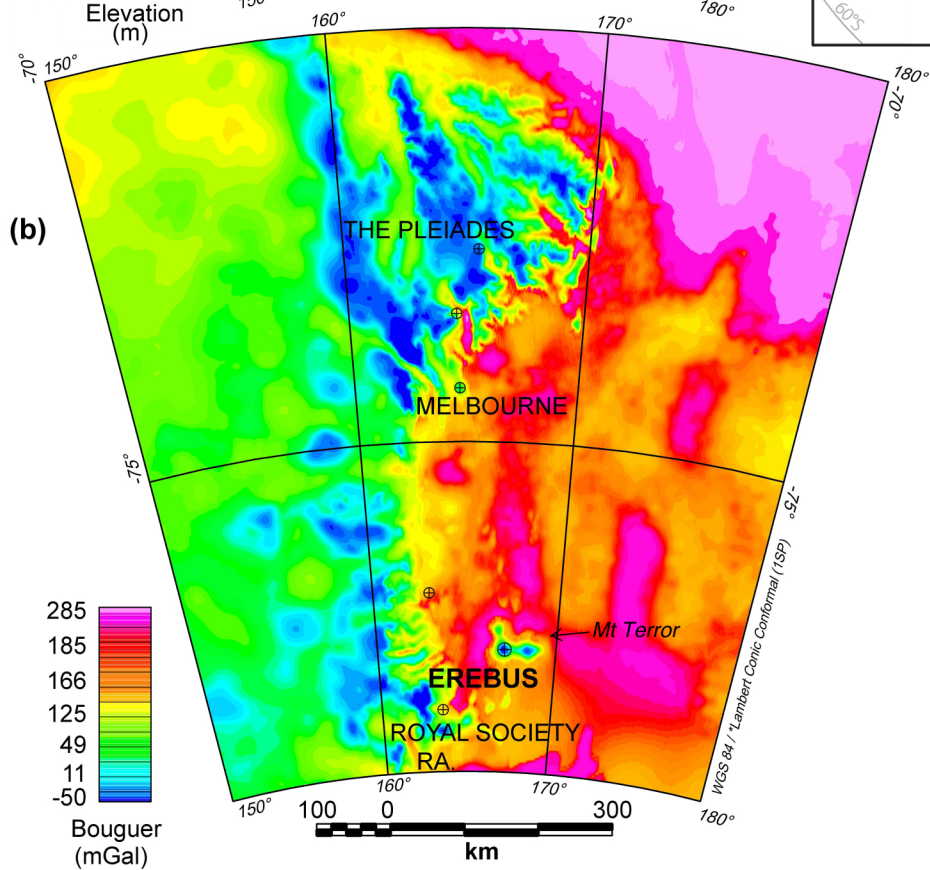

**Supplementary Hi 05** Elevation and Bouguer gravity images of the Mount Erebus volcano (Ross Island) and surrounds, Antarctica. This active volcano and the neighbouring (inactive) Mount Terror volcano (and 2 smaller inactive volcanoes on Ross Island) are interpreted to overlie the Mount Erebus hotspot (see text of main article).

- (a) Enhanced digital elevation model (from ETOPO1 topography data downloaded from the Bureau Gravimétrique International).
- (b) Bouguer gravity anomalies (prepared using WGM2012 bouguer gravity data downloaded from the Bureau Gravimétrique International). Note that Mt. Erebus & Mt. Terror correspond to Bouguer gravity lows within a gravity high, similar to Iceland (see text of main article).

Insert = location map, modified after linework from the Scientific Committee on Antarctic Research (SCAR) Antarctic Digital Database.
